# Supplementary material for: The Hetero-Hexameric Nature of a Chloroplast AAA+ FtsH Protease Contributes to Its Thermodynamic Stability
Source: PubMed Central journal article supplement (PMC3339871; doi:10.1371/journal.pone.0036008), 2012-04-27
Supplement: pone.0036008.s004.pdf [file pone.0036008.s004.pdf]

Supplemental Table 2. MS Analysis of Chloroplast Proteins Co-Purifying with FtsH2-HA.

Seq 20187 - #1 - No Identification

Seq 20188 - #2

| Serial#                                                                                                                                                                                                                                                                                                                                                                                                                                                                                                                                                                                                                                                                                                                                                                                                                                                                                                                                                                                                                                                                                                                                                                                                                                                                                                                                                                                                                                                                                                                                                                           | Gi       | Protein Name                                                                                            | Comment                          | Identified peptides | Coverage |         |        |          |        |       |   |    |          |               |   |        |   |    |          |               |   |        |   |    |          |                |   |        |   |    |          |               |   |        |   |    |          |                         |   |        |   |    |          |             |   |        |   |    |         |           |   |        |   |    |          |                |   |        |   |    |          |                         |   |        |    |    |          |                         |   |        |    |    |          |                                  |   |        |    |    |          |               |   |        |    |    |          |               |   |        |    |    |          |                              |   |  |
|-----------------------------------------------------------------------------------------------------------------------------------------------------------------------------------------------------------------------------------------------------------------------------------------------------------------------------------------------------------------------------------------------------------------------------------------------------------------------------------------------------------------------------------------------------------------------------------------------------------------------------------------------------------------------------------------------------------------------------------------------------------------------------------------------------------------------------------------------------------------------------------------------------------------------------------------------------------------------------------------------------------------------------------------------------------------------------------------------------------------------------------------------------------------------------------------------------------------------------------------------------------------------------------------------------------------------------------------------------------------------------------------------------------------------------------------------------------------------------------------------------------------------------------------------------------------------------------|----------|---------------------------------------------------------------------------------------------------------|----------------------------------|---------------------|----------|---------|--------|----------|--------|-------|---|----|----------|---------------|---|--------|---|----|----------|---------------|---|--------|---|----|----------|----------------|---|--------|---|----|----------|---------------|---|--------|---|----|----------|-------------------------|---|--------|---|----|----------|-------------|---|--------|---|----|---------|-----------|---|--------|---|----|----------|----------------|---|--------|---|----|----------|-------------------------|---|--------|----|----|----------|-------------------------|---|--------|----|----|----------|----------------------------------|---|--------|----|----|----------|---------------|---|--------|----|----|----------|---------------|---|--------|----|----|----------|------------------------------|---|--|
| 1                                                                                                                                                                                                                                                                                                                                                                                                                                                                                                                                                                                                                                                                                                                                                                                                                                                                                                                                                                                                                                                                                                                                                                                                                                                                                                                                                                                                                                                                                                                                                                                 | 3894767  | VAR2 (VARIEGATED 2); ATP-dependent peptidase/ ATPase/ metallopeptidase/ zinc ion binding [Arabidopsi... |                                  | 11                  | 18%      |         |        |          |        |       |   |    |          |               |   |        |   |    |          |               |   |        |   |    |          |                |   |        |   |    |          |               |   |        |   |    |          |                         |   |        |   |    |          |             |   |        |   |    |         |           |   |        |   |    |          |                |   |        |   |    |          |                         |   |        |    |    |          |                         |   |        |    |    |          |                                  |   |        |    |    |          |               |   |        |    |    |          |               |   |        |    |    |          |                              |   |  |
| <table border="1"> <thead> <tr> <th>&gt; Score</th> <th>&gt; Mass</th> <th>Sequence</th> <th>Charge</th> <th>xCorr</th> </tr> </thead> <tbody> <tr><td>1</td><td>95</td><td>1396.791</td><td>ADILDSALLRPGR</td><td>3</td><td>1.8472</td></tr> <tr><td>2</td><td>75</td><td>962.4426</td><td>EIDDSIDR</td><td>2</td><td>1.7605</td></tr> <tr><td>3</td><td>76</td><td>1546.811</td><td>LSDSAYEIALSHIK</td><td></td><td></td></tr> <tr><td>4</td><td>88</td><td>1032.471</td><td>GTGIGGGNDER</td><td>2</td><td>2.6868</td></tr> <tr><td>5</td><td>90</td><td>1060.552</td><td>LAEDIDSAVK</td><td>2</td><td>2.5473</td></tr> <tr><td>6</td><td>87</td><td>1188.647</td><td>LAEDIDSAVKK</td><td>2</td><td>2.8219</td></tr> <tr><td>7</td><td>82</td><td>1198.61</td><td>FLEYLDKDR</td><td>2</td><td>1.8303</td></tr> <tr><td>8</td><td>88</td><td>1408.681</td><td>IVAGMEGTVMTDGG</td><td>2</td><td>3.6813</td></tr> <tr><td>9</td><td>94</td><td>1424.676</td><td>IVAGM(+15.995)EGTVMTDGG</td><td>2</td><td>3.6813</td></tr> <tr><td>10</td><td>91</td><td>1424.676</td><td>IVAGMEGTVM(+15.995)TDGK</td><td>2</td><td>3.6813</td></tr> <tr><td>11</td><td>82</td><td>1440.671</td><td>IVAGM(+15.995)EGTVM(+15.995)TDGK</td><td>2</td><td>3.6813</td></tr> <tr><td>12</td><td>90</td><td>1452.842</td><td>VQLPGLSQELLEK</td><td>2</td><td>3.0845</td></tr> <tr><td>13</td><td>83</td><td>1516.829</td><td>EAMDKLVEVLLEK</td><td>2</td><td>2.5205</td></tr> <tr><td>14</td><td>82</td><td>1902.876</td><td>SGGGM(+15.995)GGPGGPNLQFGQSK</td><td>2</td><td></td></tr> </tbody> </table> |          |                                                                                                         |                                  |                     |          | > Score | > Mass | Sequence | Charge | xCorr | 1 | 95 | 1396.791 | ADILDSALLRPGR | 3 | 1.8472 | 2 | 75 | 962.4426 | EIDDSIDR      | 2 | 1.7605 | 3 | 76 | 1546.811 | LSDSAYEIALSHIK |   |        | 4 | 88 | 1032.471 | GTGIGGGNDER   | 2 | 2.6868 | 5 | 90 | 1060.552 | LAEDIDSAVK              | 2 | 2.5473 | 6 | 87 | 1188.647 | LAEDIDSAVKK | 2 | 2.8219 | 7 | 82 | 1198.61 | FLEYLDKDR | 2 | 1.8303 | 8 | 88 | 1408.681 | IVAGMEGTVMTDGG | 2 | 3.6813 | 9 | 94 | 1424.676 | IVAGM(+15.995)EGTVMTDGG | 2 | 3.6813 | 10 | 91 | 1424.676 | IVAGMEGTVM(+15.995)TDGK | 2 | 3.6813 | 11 | 82 | 1440.671 | IVAGM(+15.995)EGTVM(+15.995)TDGK | 2 | 3.6813 | 12 | 90 | 1452.842 | VQLPGLSQELLEK | 2 | 3.0845 | 13 | 83 | 1516.829 | EAMDKLVEVLLEK | 2 | 2.5205 | 14 | 82 | 1902.876 | SGGGM(+15.995)GGPGGPNLQFGQSK | 2 |  |
| > Score                                                                                                                                                                                                                                                                                                                                                                                                                                                                                                                                                                                                                                                                                                                                                                                                                                                                                                                                                                                                                                                                                                                                                                                                                                                                                                                                                                                                                                                                                                                                                                           | > Mass   | Sequence                                                                                                | Charge                           | xCorr               |          |         |        |          |        |       |   |    |          |               |   |        |   |    |          |               |   |        |   |    |          |                |   |        |   |    |          |               |   |        |   |    |          |                         |   |        |   |    |          |             |   |        |   |    |         |           |   |        |   |    |          |                |   |        |   |    |          |                         |   |        |    |    |          |                         |   |        |    |    |          |                                  |   |        |    |    |          |               |   |        |    |    |          |               |   |        |    |    |          |                              |   |  |
| 1                                                                                                                                                                                                                                                                                                                                                                                                                                                                                                                                                                                                                                                                                                                                                                                                                                                                                                                                                                                                                                                                                                                                                                                                                                                                                                                                                                                                                                                                                                                                                                                 | 95       | 1396.791                                                                                                | ADILDSALLRPGR                    | 3                   | 1.8472   |         |        |          |        |       |   |    |          |               |   |        |   |    |          |               |   |        |   |    |          |                |   |        |   |    |          |               |   |        |   |    |          |                         |   |        |   |    |          |             |   |        |   |    |         |           |   |        |   |    |          |                |   |        |   |    |          |                         |   |        |    |    |          |                         |   |        |    |    |          |                                  |   |        |    |    |          |               |   |        |    |    |          |               |   |        |    |    |          |                              |   |  |
| 2                                                                                                                                                                                                                                                                                                                                                                                                                                                                                                                                                                                                                                                                                                                                                                                                                                                                                                                                                                                                                                                                                                                                                                                                                                                                                                                                                                                                                                                                                                                                                                                 | 75       | 962.4426                                                                                                | EIDDSIDR                         | 2                   | 1.7605   |         |        |          |        |       |   |    |          |               |   |        |   |    |          |               |   |        |   |    |          |                |   |        |   |    |          |               |   |        |   |    |          |                         |   |        |   |    |          |             |   |        |   |    |         |           |   |        |   |    |          |                |   |        |   |    |          |                         |   |        |    |    |          |                         |   |        |    |    |          |                                  |   |        |    |    |          |               |   |        |    |    |          |               |   |        |    |    |          |                              |   |  |
| 3                                                                                                                                                                                                                                                                                                                                                                                                                                                                                                                                                                                                                                                                                                                                                                                                                                                                                                                                                                                                                                                                                                                                                                                                                                                                                                                                                                                                                                                                                                                                                                                 | 76       | 1546.811                                                                                                | LSDSAYEIALSHIK                   |                     |          |         |        |          |        |       |   |    |          |               |   |        |   |    |          |               |   |        |   |    |          |                |   |        |   |    |          |               |   |        |   |    |          |                         |   |        |   |    |          |             |   |        |   |    |         |           |   |        |   |    |          |                |   |        |   |    |          |                         |   |        |    |    |          |                         |   |        |    |    |          |                                  |   |        |    |    |          |               |   |        |    |    |          |               |   |        |    |    |          |                              |   |  |
| 4                                                                                                                                                                                                                                                                                                                                                                                                                                                                                                                                                                                                                                                                                                                                                                                                                                                                                                                                                                                                                                                                                                                                                                                                                                                                                                                                                                                                                                                                                                                                                                                 | 88       | 1032.471                                                                                                | GTGIGGGNDER                      | 2                   | 2.6868   |         |        |          |        |       |   |    |          |               |   |        |   |    |          |               |   |        |   |    |          |                |   |        |   |    |          |               |   |        |   |    |          |                         |   |        |   |    |          |             |   |        |   |    |         |           |   |        |   |    |          |                |   |        |   |    |          |                         |   |        |    |    |          |                         |   |        |    |    |          |                                  |   |        |    |    |          |               |   |        |    |    |          |               |   |        |    |    |          |                              |   |  |
| 5                                                                                                                                                                                                                                                                                                                                                                                                                                                                                                                                                                                                                                                                                                                                                                                                                                                                                                                                                                                                                                                                                                                                                                                                                                                                                                                                                                                                                                                                                                                                                                                 | 90       | 1060.552                                                                                                | LAEDIDSAVK                       | 2                   | 2.5473   |         |        |          |        |       |   |    |          |               |   |        |   |    |          |               |   |        |   |    |          |                |   |        |   |    |          |               |   |        |   |    |          |                         |   |        |   |    |          |             |   |        |   |    |         |           |   |        |   |    |          |                |   |        |   |    |          |                         |   |        |    |    |          |                         |   |        |    |    |          |                                  |   |        |    |    |          |               |   |        |    |    |          |               |   |        |    |    |          |                              |   |  |
| 6                                                                                                                                                                                                                                                                                                                                                                                                                                                                                                                                                                                                                                                                                                                                                                                                                                                                                                                                                                                                                                                                                                                                                                                                                                                                                                                                                                                                                                                                                                                                                                                 | 87       | 1188.647                                                                                                | LAEDIDSAVKK                      | 2                   | 2.8219   |         |        |          |        |       |   |    |          |               |   |        |   |    |          |               |   |        |   |    |          |                |   |        |   |    |          |               |   |        |   |    |          |                         |   |        |   |    |          |             |   |        |   |    |         |           |   |        |   |    |          |                |   |        |   |    |          |                         |   |        |    |    |          |                         |   |        |    |    |          |                                  |   |        |    |    |          |               |   |        |    |    |          |               |   |        |    |    |          |                              |   |  |
| 7                                                                                                                                                                                                                                                                                                                                                                                                                                                                                                                                                                                                                                                                                                                                                                                                                                                                                                                                                                                                                                                                                                                                                                                                                                                                                                                                                                                                                                                                                                                                                                                 | 82       | 1198.61                                                                                                 | FLEYLDKDR                        | 2                   | 1.8303   |         |        |          |        |       |   |    |          |               |   |        |   |    |          |               |   |        |   |    |          |                |   |        |   |    |          |               |   |        |   |    |          |                         |   |        |   |    |          |             |   |        |   |    |         |           |   |        |   |    |          |                |   |        |   |    |          |                         |   |        |    |    |          |                         |   |        |    |    |          |                                  |   |        |    |    |          |               |   |        |    |    |          |               |   |        |    |    |          |                              |   |  |
| 8                                                                                                                                                                                                                                                                                                                                                                                                                                                                                                                                                                                                                                                                                                                                                                                                                                                                                                                                                                                                                                                                                                                                                                                                                                                                                                                                                                                                                                                                                                                                                                                 | 88       | 1408.681                                                                                                | IVAGMEGTVMTDGG                   | 2                   | 3.6813   |         |        |          |        |       |   |    |          |               |   |        |   |    |          |               |   |        |   |    |          |                |   |        |   |    |          |               |   |        |   |    |          |                         |   |        |   |    |          |             |   |        |   |    |         |           |   |        |   |    |          |                |   |        |   |    |          |                         |   |        |    |    |          |                         |   |        |    |    |          |                                  |   |        |    |    |          |               |   |        |    |    |          |               |   |        |    |    |          |                              |   |  |
| 9                                                                                                                                                                                                                                                                                                                                                                                                                                                                                                                                                                                                                                                                                                                                                                                                                                                                                                                                                                                                                                                                                                                                                                                                                                                                                                                                                                                                                                                                                                                                                                                 | 94       | 1424.676                                                                                                | IVAGM(+15.995)EGTVMTDGG          | 2                   | 3.6813   |         |        |          |        |       |   |    |          |               |   |        |   |    |          |               |   |        |   |    |          |                |   |        |   |    |          |               |   |        |   |    |          |                         |   |        |   |    |          |             |   |        |   |    |         |           |   |        |   |    |          |                |   |        |   |    |          |                         |   |        |    |    |          |                         |   |        |    |    |          |                                  |   |        |    |    |          |               |   |        |    |    |          |               |   |        |    |    |          |                              |   |  |
| 10                                                                                                                                                                                                                                                                                                                                                                                                                                                                                                                                                                                                                                                                                                                                                                                                                                                                                                                                                                                                                                                                                                                                                                                                                                                                                                                                                                                                                                                                                                                                                                                | 91       | 1424.676                                                                                                | IVAGMEGTVM(+15.995)TDGK          | 2                   | 3.6813   |         |        |          |        |       |   |    |          |               |   |        |   |    |          |               |   |        |   |    |          |                |   |        |   |    |          |               |   |        |   |    |          |                         |   |        |   |    |          |             |   |        |   |    |         |           |   |        |   |    |          |                |   |        |   |    |          |                         |   |        |    |    |          |                         |   |        |    |    |          |                                  |   |        |    |    |          |               |   |        |    |    |          |               |   |        |    |    |          |                              |   |  |
| 11                                                                                                                                                                                                                                                                                                                                                                                                                                                                                                                                                                                                                                                                                                                                                                                                                                                                                                                                                                                                                                                                                                                                                                                                                                                                                                                                                                                                                                                                                                                                                                                | 82       | 1440.671                                                                                                | IVAGM(+15.995)EGTVM(+15.995)TDGK | 2                   | 3.6813   |         |        |          |        |       |   |    |          |               |   |        |   |    |          |               |   |        |   |    |          |                |   |        |   |    |          |               |   |        |   |    |          |                         |   |        |   |    |          |             |   |        |   |    |         |           |   |        |   |    |          |                |   |        |   |    |          |                         |   |        |    |    |          |                         |   |        |    |    |          |                                  |   |        |    |    |          |               |   |        |    |    |          |               |   |        |    |    |          |                              |   |  |
| 12                                                                                                                                                                                                                                                                                                                                                                                                                                                                                                                                                                                                                                                                                                                                                                                                                                                                                                                                                                                                                                                                                                                                                                                                                                                                                                                                                                                                                                                                                                                                                                                | 90       | 1452.842                                                                                                | VQLPGLSQELLEK                    | 2                   | 3.0845   |         |        |          |        |       |   |    |          |               |   |        |   |    |          |               |   |        |   |    |          |                |   |        |   |    |          |               |   |        |   |    |          |                         |   |        |   |    |          |             |   |        |   |    |         |           |   |        |   |    |          |                |   |        |   |    |          |                         |   |        |    |    |          |                         |   |        |    |    |          |                                  |   |        |    |    |          |               |   |        |    |    |          |               |   |        |    |    |          |                              |   |  |
| 13                                                                                                                                                                                                                                                                                                                                                                                                                                                                                                                                                                                                                                                                                                                                                                                                                                                                                                                                                                                                                                                                                                                                                                                                                                                                                                                                                                                                                                                                                                                                                                                | 83       | 1516.829                                                                                                | EAMDKLVEVLLEK                    | 2                   | 2.5205   |         |        |          |        |       |   |    |          |               |   |        |   |    |          |               |   |        |   |    |          |                |   |        |   |    |          |               |   |        |   |    |          |                         |   |        |   |    |          |             |   |        |   |    |         |           |   |        |   |    |          |                |   |        |   |    |          |                         |   |        |    |    |          |                         |   |        |    |    |          |                                  |   |        |    |    |          |               |   |        |    |    |          |               |   |        |    |    |          |                              |   |  |
| 14                                                                                                                                                                                                                                                                                                                                                                                                                                                                                                                                                                                                                                                                                                                                                                                                                                                                                                                                                                                                                                                                                                                                                                                                                                                                                                                                                                                                                                                                                                                                                                                | 82       | 1902.876                                                                                                | SGGGM(+15.995)GGPGGPNLQFGQSK     | 2                   |          |         |        |          |        |       |   |    |          |               |   |        |   |    |          |               |   |        |   |    |          |                |   |        |   |    |          |               |   |        |   |    |          |                         |   |        |   |    |          |             |   |        |   |    |         |           |   |        |   |    |          |                |   |        |   |    |          |                         |   |        |    |    |          |                         |   |        |    |    |          |                                  |   |        |    |    |          |               |   |        |    |    |          |               |   |        |    |    |          |                              |   |  |
| 2                                                                                                                                                                                                                                                                                                                                                                                                                                                                                                                                                                                                                                                                                                                                                                                                                                                                                                                                                                                                                                                                                                                                                                                                                                                                                                                                                                                                                                                                                                                                                                                 | 18422193 | VAR1 (VARIEGATED 1); ATP-dependent peptidase/ ATPase/ metallopeptidase [Arabidopsis thaliana]           |                                  | 5                   | 7%       |         |        |          |        |       |   |    |          |               |   |        |   |    |          |               |   |        |   |    |          |                |   |        |   |    |          |               |   |        |   |    |          |                         |   |        |   |    |          |             |   |        |   |    |         |           |   |        |   |    |          |                |   |        |   |    |          |                         |   |        |    |    |          |                         |   |        |    |    |          |                                  |   |        |    |    |          |               |   |        |    |    |          |               |   |        |    |    |          |                              |   |  |
|                                                                                                                                                                                                                                                                                                                                                                                                                                                                                                                                                                                                                                                                                                                                                                                                                                                                                                                                                                                                                                                                                                                                                                                                                                                                                                                                                                                                                                                                                                                                                                                   | 18402995 | FTSH1 (FtsH protease 1); ATP-dependent peptidase/ ATPase/ metallopeptidase [Arabidopsis thaliana]       |                                  |                     | 7%       |         |        |          |        |       |   |    |          |               |   |        |   |    |          |               |   |        |   |    |          |                |   |        |   |    |          |               |   |        |   |    |          |                         |   |        |   |    |          |             |   |        |   |    |         |           |   |        |   |    |          |                |   |        |   |    |          |                         |   |        |    |    |          |                         |   |        |    |    |          |                                  |   |        |    |    |          |               |   |        |    |    |          |               |   |        |    |    |          |                              |   |  |
|                                                                                                                                                                                                                                                                                                                                                                                                                                                                                                                                                                                                                                                                                                                                                                                                                                                                                                                                                                                                                                                                                                                                                                                                                                                                                                                                                                                                                                                                                                                                                                                   | 1483215  | chloroplast FtsH protease [Arabidopsis thaliana]                                                        |                                  |                     | 7%       |         |        |          |        |       |   |    |          |               |   |        |   |    |          |               |   |        |   |    |          |                |   |        |   |    |          |               |   |        |   |    |          |                         |   |        |   |    |          |             |   |        |   |    |         |           |   |        |   |    |          |                |   |        |   |    |          |                         |   |        |    |    |          |                         |   |        |    |    |          |                                  |   |        |    |    |          |               |   |        |    |    |          |               |   |        |    |    |          |                              |   |  |
| <table border="1"> <thead> <tr> <th>&gt; Score</th> <th>&gt; Mass</th> <th>Sequence</th> <th>Charge</th> <th>xCorr</th> </tr> </thead> <tbody> <tr><td>1</td><td>79</td><td>875.4471</td><td>NAVVSEEK</td><td>2</td><td>1.5375</td></tr> <tr><td>2</td><td>80</td><td>924.4788</td><td>LESGLYSR</td><td>2</td><td>1.9012</td></tr> <tr><td>3</td><td>77</td><td>1198.647</td><td>YSEFLNAVKK</td><td>2</td><td>2.1127</td></tr> <tr><td>4</td><td>86</td><td>1332.741</td><td>LLELQEVDFLK</td><td>2</td><td>3.1186</td></tr> <tr><td>5</td><td>85</td><td>1524.748</td><td>SYLENQM(+15.995)AVALGGR</td><td>2</td><td>3.0634</td></tr> </tbody> </table>                                                                                                                                                                                                                                                                                                                                                                                                                                                                                                                                                                                                                                                                                                                                                                                                                                                                                                                            |          |                                                                                                         |                                  |                     |          | > Score | > Mass | Sequence | Charge | xCorr | 1 | 79 | 875.4471 | NAVVSEEK      | 2 | 1.5375 | 2 | 80 | 924.4788 | LESGLYSR      | 2 | 1.9012 | 3 | 77 | 1198.647 | YSEFLNAVKK     | 2 | 2.1127 | 4 | 86 | 1332.741 | LLELQEVDFLK   | 2 | 3.1186 | 5 | 85 | 1524.748 | SYLENQM(+15.995)AVALGGR | 2 | 3.0634 |   |    |          |             |   |        |   |    |         |           |   |        |   |    |          |                |   |        |   |    |          |                         |   |        |    |    |          |                         |   |        |    |    |          |                                  |   |        |    |    |          |               |   |        |    |    |          |               |   |        |    |    |          |                              |   |  |
| > Score                                                                                                                                                                                                                                                                                                                                                                                                                                                                                                                                                                                                                                                                                                                                                                                                                                                                                                                                                                                                                                                                                                                                                                                                                                                                                                                                                                                                                                                                                                                                                                           | > Mass   | Sequence                                                                                                | Charge                           | xCorr               |          |         |        |          |        |       |   |    |          |               |   |        |   |    |          |               |   |        |   |    |          |                |   |        |   |    |          |               |   |        |   |    |          |                         |   |        |   |    |          |             |   |        |   |    |         |           |   |        |   |    |          |                |   |        |   |    |          |                         |   |        |    |    |          |                         |   |        |    |    |          |                                  |   |        |    |    |          |               |   |        |    |    |          |               |   |        |    |    |          |                              |   |  |
| 1                                                                                                                                                                                                                                                                                                                                                                                                                                                                                                                                                                                                                                                                                                                                                                                                                                                                                                                                                                                                                                                                                                                                                                                                                                                                                                                                                                                                                                                                                                                                                                                 | 79       | 875.4471                                                                                                | NAVVSEEK                         | 2                   | 1.5375   |         |        |          |        |       |   |    |          |               |   |        |   |    |          |               |   |        |   |    |          |                |   |        |   |    |          |               |   |        |   |    |          |                         |   |        |   |    |          |             |   |        |   |    |         |           |   |        |   |    |          |                |   |        |   |    |          |                         |   |        |    |    |          |                         |   |        |    |    |          |                                  |   |        |    |    |          |               |   |        |    |    |          |               |   |        |    |    |          |                              |   |  |
| 2                                                                                                                                                                                                                                                                                                                                                                                                                                                                                                                                                                                                                                                                                                                                                                                                                                                                                                                                                                                                                                                                                                                                                                                                                                                                                                                                                                                                                                                                                                                                                                                 | 80       | 924.4788                                                                                                | LESGLYSR                         | 2                   | 1.9012   |         |        |          |        |       |   |    |          |               |   |        |   |    |          |               |   |        |   |    |          |                |   |        |   |    |          |               |   |        |   |    |          |                         |   |        |   |    |          |             |   |        |   |    |         |           |   |        |   |    |          |                |   |        |   |    |          |                         |   |        |    |    |          |                         |   |        |    |    |          |                                  |   |        |    |    |          |               |   |        |    |    |          |               |   |        |    |    |          |                              |   |  |
| 3                                                                                                                                                                                                                                                                                                                                                                                                                                                                                                                                                                                                                                                                                                                                                                                                                                                                                                                                                                                                                                                                                                                                                                                                                                                                                                                                                                                                                                                                                                                                                                                 | 77       | 1198.647                                                                                                | YSEFLNAVKK                       | 2                   | 2.1127   |         |        |          |        |       |   |    |          |               |   |        |   |    |          |               |   |        |   |    |          |                |   |        |   |    |          |               |   |        |   |    |          |                         |   |        |   |    |          |             |   |        |   |    |         |           |   |        |   |    |          |                |   |        |   |    |          |                         |   |        |    |    |          |                         |   |        |    |    |          |                                  |   |        |    |    |          |               |   |        |    |    |          |               |   |        |    |    |          |                              |   |  |
| 4                                                                                                                                                                                                                                                                                                                                                                                                                                                                                                                                                                                                                                                                                                                                                                                                                                                                                                                                                                                                                                                                                                                                                                                                                                                                                                                                                                                                                                                                                                                                                                                 | 86       | 1332.741                                                                                                | LLELQEVDFLK                      | 2                   | 3.1186   |         |        |          |        |       |   |    |          |               |   |        |   |    |          |               |   |        |   |    |          |                |   |        |   |    |          |               |   |        |   |    |          |                         |   |        |   |    |          |             |   |        |   |    |         |           |   |        |   |    |          |                |   |        |   |    |          |                         |   |        |    |    |          |                         |   |        |    |    |          |                                  |   |        |    |    |          |               |   |        |    |    |          |               |   |        |    |    |          |                              |   |  |
| 5                                                                                                                                                                                                                                                                                                                                                                                                                                                                                                                                                                                                                                                                                                                                                                                                                                                                                                                                                                                                                                                                                                                                                                                                                                                                                                                                                                                                                                                                                                                                                                                 | 85       | 1524.748                                                                                                | SYLENQM(+15.995)AVALGGR          | 2                   | 3.0634   |         |        |          |        |       |   |    |          |               |   |        |   |    |          |               |   |        |   |    |          |                |   |        |   |    |          |               |   |        |   |    |          |                         |   |        |   |    |          |             |   |        |   |    |         |           |   |        |   |    |          |                |   |        |   |    |          |                         |   |        |    |    |          |                         |   |        |    |    |          |                                  |   |        |    |    |          |               |   |        |    |    |          |               |   |        |    |    |          |                              |   |  |
| 3                                                                                                                                                                                                                                                                                                                                                                                                                                                                                                                                                                                                                                                                                                                                                                                                                                                                                                                                                                                                                                                                                                                                                                                                                                                                                                                                                                                                                                                                                                                                                                                 | 7526018  | ATP synthase CF1 alpha subunit [Arabidopsis thaliana]                                                   |                                  | 4                   | 9%       |         |        |          |        |       |   |    |          |               |   |        |   |    |          |               |   |        |   |    |          |                |   |        |   |    |          |               |   |        |   |    |          |                         |   |        |   |    |          |             |   |        |   |    |         |           |   |        |   |    |          |                |   |        |   |    |          |                         |   |        |    |    |          |                         |   |        |    |    |          |                                  |   |        |    |    |          |               |   |        |    |    |          |               |   |        |    |    |          |                              |   |  |
| <table border="1"> <thead> <tr> <th>&gt; Score</th> <th>&gt; Mass</th> <th>Sequence</th> <th>Charge</th> <th>xCorr</th> </tr> </thead> <tbody> <tr><td>1</td><td>82</td><td>876.5191</td><td>FLLQEKV</td><td>2</td><td>1.6795</td></tr> <tr><td>2</td><td>90</td><td>1252.701</td><td>VINALANPIDGR</td><td>2</td><td>3.5935</td></tr> <tr><td>3</td><td>85</td><td>1252.726</td><td>LIESPAPGIISR</td><td>2</td><td>2.849</td></tr> <tr><td>4</td><td>89</td><td>1416.785</td><td>IAQIPVSEAYLGR</td><td>2</td><td>2.6379</td></tr> </tbody> </table>                                                                                                                                                                                                                                                                                                                                                                                                                                                                                                                                                                                                                                                                                                                                                                                                                                                                                                                                                                                                                               |          |                                                                                                         |                                  |                     |          | > Score | > Mass | Sequence | Charge | xCorr | 1 | 82 | 876.5191 | FLLQEKV       | 2 | 1.6795 | 2 | 90 | 1252.701 | VINALANPIDGR  | 2 | 3.5935 | 3 | 85 | 1252.726 | LIESPAPGIISR   | 2 | 2.849  | 4 | 89 | 1416.785 | IAQIPVSEAYLGR | 2 | 2.6379 |   |    |          |                         |   |        |   |    |          |             |   |        |   |    |         |           |   |        |   |    |          |                |   |        |   |    |          |                         |   |        |    |    |          |                         |   |        |    |    |          |                                  |   |        |    |    |          |               |   |        |    |    |          |               |   |        |    |    |          |                              |   |  |
| > Score                                                                                                                                                                                                                                                                                                                                                                                                                                                                                                                                                                                                                                                                                                                                                                                                                                                                                                                                                                                                                                                                                                                                                                                                                                                                                                                                                                                                                                                                                                                                                                           | > Mass   | Sequence                                                                                                | Charge                           | xCorr               |          |         |        |          |        |       |   |    |          |               |   |        |   |    |          |               |   |        |   |    |          |                |   |        |   |    |          |               |   |        |   |    |          |                         |   |        |   |    |          |             |   |        |   |    |         |           |   |        |   |    |          |                |   |        |   |    |          |                         |   |        |    |    |          |                         |   |        |    |    |          |                                  |   |        |    |    |          |               |   |        |    |    |          |               |   |        |    |    |          |                              |   |  |
| 1                                                                                                                                                                                                                                                                                                                                                                                                                                                                                                                                                                                                                                                                                                                                                                                                                                                                                                                                                                                                                                                                                                                                                                                                                                                                                                                                                                                                                                                                                                                                                                                 | 82       | 876.5191                                                                                                | FLLQEKV                          | 2                   | 1.6795   |         |        |          |        |       |   |    |          |               |   |        |   |    |          |               |   |        |   |    |          |                |   |        |   |    |          |               |   |        |   |    |          |                         |   |        |   |    |          |             |   |        |   |    |         |           |   |        |   |    |          |                |   |        |   |    |          |                         |   |        |    |    |          |                         |   |        |    |    |          |                                  |   |        |    |    |          |               |   |        |    |    |          |               |   |        |    |    |          |                              |   |  |
| 2                                                                                                                                                                                                                                                                                                                                                                                                                                                                                                                                                                                                                                                                                                                                                                                                                                                                                                                                                                                                                                                                                                                                                                                                                                                                                                                                                                                                                                                                                                                                                                                 | 90       | 1252.701                                                                                                | VINALANPIDGR                     | 2                   | 3.5935   |         |        |          |        |       |   |    |          |               |   |        |   |    |          |               |   |        |   |    |          |                |   |        |   |    |          |               |   |        |   |    |          |                         |   |        |   |    |          |             |   |        |   |    |         |           |   |        |   |    |          |                |   |        |   |    |          |                         |   |        |    |    |          |                         |   |        |    |    |          |                                  |   |        |    |    |          |               |   |        |    |    |          |               |   |        |    |    |          |                              |   |  |
| 3                                                                                                                                                                                                                                                                                                                                                                                                                                                                                                                                                                                                                                                                                                                                                                                                                                                                                                                                                                                                                                                                                                                                                                                                                                                                                                                                                                                                                                                                                                                                                                                 | 85       | 1252.726                                                                                                | LIESPAPGIISR                     | 2                   | 2.849    |         |        |          |        |       |   |    |          |               |   |        |   |    |          |               |   |        |   |    |          |                |   |        |   |    |          |               |   |        |   |    |          |                         |   |        |   |    |          |             |   |        |   |    |         |           |   |        |   |    |          |                |   |        |   |    |          |                         |   |        |    |    |          |                         |   |        |    |    |          |                                  |   |        |    |    |          |               |   |        |    |    |          |               |   |        |    |    |          |                              |   |  |
| 4                                                                                                                                                                                                                                                                                                                                                                                                                                                                                                                                                                                                                                                                                                                                                                                                                                                                                                                                                                                                                                                                                                                                                                                                                                                                                                                                                                                                                                                                                                                                                                                 | 89       | 1416.785                                                                                                | IAQIPVSEAYLGR                    | 2                   | 2.6379   |         |        |          |        |       |   |    |          |               |   |        |   |    |          |               |   |        |   |    |          |                |   |        |   |    |          |               |   |        |   |    |          |                         |   |        |   |    |          |             |   |        |   |    |         |           |   |        |   |    |          |                |   |        |   |    |          |                         |   |        |    |    |          |                         |   |        |    |    |          |                                  |   |        |    |    |          |               |   |        |    |    |          |               |   |        |    |    |          |                              |   |  |
| 4                                                                                                                                                                                                                                                                                                                                                                                                                                                                                                                                                                                                                                                                                                                                                                                                                                                                                                                                                                                                                                                                                                                                                                                                                                                                                                                                                                                                                                                                                                                                                                                 | 7526040  | ATP synthase CF1 beta subunit [Arabidopsis thaliana]                                                    |                                  | 3                   | 8%       |         |        |          |        |       |   |    |          |               |   |        |   |    |          |               |   |        |   |    |          |                |   |        |   |    |          |               |   |        |   |    |          |                         |   |        |   |    |          |             |   |        |   |    |         |           |   |        |   |    |          |                |   |        |   |    |          |                         |   |        |    |    |          |                         |   |        |    |    |          |                                  |   |        |    |    |          |               |   |        |    |    |          |               |   |        |    |    |          |                              |   |  |
| <table border="1"> <thead> <tr> <th>&gt; Score</th> <th>&gt; Mass</th> <th>Sequence</th> <th>Charge</th> <th>xCorr</th> </tr> </thead> <tbody> <tr><td>1</td><td>86</td><td>975.5624</td><td>IGLFGGAGVGK</td><td>2</td><td>2.9443</td></tr> <tr><td>2</td><td>85</td><td>1415.713</td><td>TNPTTSNPEVSIR</td><td>2</td><td>1.4419</td></tr> <tr><td>3</td><td>80</td><td>1517.744</td><td>ESGVINEQNLAESK</td><td>2</td><td>2.5698</td></tr> </tbody> </table>                                                                                                                                                                                                                                                                                                                                                                                                                                                                                                                                                                                                                                                                                                                                                                                                                                                                                                                                                                                                                                                                                                                      |          |                                                                                                         |                                  |                     |          | > Score | > Mass | Sequence | Charge | xCorr | 1 | 86 | 975.5624 | IGLFGGAGVGK   | 2 | 2.9443 | 2 | 85 | 1415.713 | TNPTTSNPEVSIR | 2 | 1.4419 | 3 | 80 | 1517.744 | ESGVINEQNLAESK | 2 | 2.5698 |   |    |          |               |   |        |   |    |          |                         |   |        |   |    |          |             |   |        |   |    |         |           |   |        |   |    |          |                |   |        |   |    |          |                         |   |        |    |    |          |                         |   |        |    |    |          |                                  |   |        |    |    |          |               |   |        |    |    |          |               |   |        |    |    |          |                              |   |  |
| > Score                                                                                                                                                                                                                                                                                                                                                                                                                                                                                                                                                                                                                                                                                                                                                                                                                                                                                                                                                                                                                                                                                                                                                                                                                                                                                                                                                                                                                                                                                                                                                                           | > Mass   | Sequence                                                                                                | Charge                           | xCorr               |          |         |        |          |        |       |   |    |          |               |   |        |   |    |          |               |   |        |   |    |          |                |   |        |   |    |          |               |   |        |   |    |          |                         |   |        |   |    |          |             |   |        |   |    |         |           |   |        |   |    |          |                |   |        |   |    |          |                         |   |        |    |    |          |                         |   |        |    |    |          |                                  |   |        |    |    |          |               |   |        |    |    |          |               |   |        |    |    |          |                              |   |  |
| 1                                                                                                                                                                                                                                                                                                                                                                                                                                                                                                                                                                                                                                                                                                                                                                                                                                                                                                                                                                                                                                                                                                                                                                                                                                                                                                                                                                                                                                                                                                                                                                                 | 86       | 975.5624                                                                                                | IGLFGGAGVGK                      | 2                   | 2.9443   |         |        |          |        |       |   |    |          |               |   |        |   |    |          |               |   |        |   |    |          |                |   |        |   |    |          |               |   |        |   |    |          |                         |   |        |   |    |          |             |   |        |   |    |         |           |   |        |   |    |          |                |   |        |   |    |          |                         |   |        |    |    |          |                         |   |        |    |    |          |                                  |   |        |    |    |          |               |   |        |    |    |          |               |   |        |    |    |          |                              |   |  |
| 2                                                                                                                                                                                                                                                                                                                                                                                                                                                                                                                                                                                                                                                                                                                                                                                                                                                                                                                                                                                                                                                                                                                                                                                                                                                                                                                                                                                                                                                                                                                                                                                 | 85       | 1415.713                                                                                                | TNPTTSNPEVSIR                    | 2                   | 1.4419   |         |        |          |        |       |   |    |          |               |   |        |   |    |          |               |   |        |   |    |          |                |   |        |   |    |          |               |   |        |   |    |          |                         |   |        |   |    |          |             |   |        |   |    |         |           |   |        |   |    |          |                |   |        |   |    |          |                         |   |        |    |    |          |                         |   |        |    |    |          |                                  |   |        |    |    |          |               |   |        |    |    |          |               |   |        |    |    |          |                              |   |  |
| 3                                                                                                                                                                                                                                                                                                                                                                                                                                                                                                                                                                                                                                                                                                                                                                                                                                                                                                                                                                                                                                                                                                                                                                                                                                                                                                                                                                                                                                                                                                                                                                                 | 80       | 1517.744                                                                                                | ESGVINEQNLAESK                   | 2                   | 2.5698   |         |        |          |        |       |   |    |          |               |   |        |   |    |          |               |   |        |   |    |          |                |   |        |   |    |          |               |   |        |   |    |          |                         |   |        |   |    |          |             |   |        |   |    |         |           |   |        |   |    |          |                |   |        |   |    |          |                         |   |        |    |    |          |                         |   |        |    |    |          |                                  |   |        |    |    |          |               |   |        |    |    |          |               |   |        |    |    |          |                              |   |  |
| 5                                                                                                                                                                                                                                                                                                                                                                                                                                                                                                                                                                                                                                                                                                                                                                                                                                                                                                                                                                                                                                                                                                                                                                                                                                                                                                                                                                                                                                                                                                                                                                                 | 7529033  | photosystem I P700 chlorophyll a apoprotein A1 [Arabidopsis thaliana]                                   |                                  | 2                   | 2%       |         |        |          |        |       |   |    |          |               |   |        |   |    |          |               |   |        |   |    |          |                |   |        |   |    |          |               |   |        |   |    |          |                         |   |        |   |    |          |             |   |        |   |    |         |           |   |        |   |    |          |                |   |        |   |    |          |                         |   |        |    |    |          |                         |   |        |    |    |          |                                  |   |        |    |    |          |               |   |        |    |    |          |               |   |        |    |    |          |                              |   |  |
| <table border="1"> <thead> <tr> <th>&gt; Score</th> <th>&gt; Mass</th> <th>Sequence</th> <th>Charge</th> <th>xCorr</th> </tr> </thead> <tbody> <tr><td>1</td><td>76</td><td>880.3796</td><td>DYDPTNR</td><td>2</td><td>1.1627</td></tr> <tr><td>2</td><td>81</td><td>1062.526</td><td>YSEFLTR</td><td>2</td><td>2.1231</td></tr> </tbody> </table>                                                                                                                                                                                                                                                                                                                                                                                                                                                                                                                                                                                                                                                                                                                                                                                                                                                                                                                                                                                                                                                                                                                                                                                                                                |          |                                                                                                         |                                  |                     |          | > Score | > Mass | Sequence | Charge | xCorr | 1 | 76 | 880.3796 | DYDPTNR       | 2 | 1.1627 | 2 | 81 | 1062.526 | YSEFLTR       | 2 | 2.1231 |   |    |          |                |   |        |   |    |          |               |   |        |   |    |          |                         |   |        |   |    |          |             |   |        |   |    |         |           |   |        |   |    |          |                |   |        |   |    |          |                         |   |        |    |    |          |                         |   |        |    |    |          |                                  |   |        |    |    |          |               |   |        |    |    |          |               |   |        |    |    |          |                              |   |  |
| > Score                                                                                                                                                                                                                                                                                                                                                                                                                                                                                                                                                                                                                                                                                                                                                                                                                                                                                                                                                                                                                                                                                                                                                                                                                                                                                                                                                                                                                                                                                                                                                                           | > Mass   | Sequence                                                                                                | Charge                           | xCorr               |          |         |        |          |        |       |   |    |          |               |   |        |   |    |          |               |   |        |   |    |          |                |   |        |   |    |          |               |   |        |   |    |          |                         |   |        |   |    |          |             |   |        |   |    |         |           |   |        |   |    |          |                |   |        |   |    |          |                         |   |        |    |    |          |                         |   |        |    |    |          |                                  |   |        |    |    |          |               |   |        |    |    |          |               |   |        |    |    |          |                              |   |  |
| 1                                                                                                                                                                                                                                                                                                                                                                                                                                                                                                                                                                                                                                                                                                                                                                                                                                                                                                                                                                                                                                                                                                                                                                                                                                                                                                                                                                                                                                                                                                                                                                                 | 76       | 880.3796                                                                                                | DYDPTNR                          | 2                   | 1.1627   |         |        |          |        |       |   |    |          |               |   |        |   |    |          |               |   |        |   |    |          |                |   |        |   |    |          |               |   |        |   |    |          |                         |   |        |   |    |          |             |   |        |   |    |         |           |   |        |   |    |          |                |   |        |   |    |          |                         |   |        |    |    |          |                         |   |        |    |    |          |                                  |   |        |    |    |          |               |   |        |    |    |          |               |   |        |    |    |          |                              |   |  |
| 2                                                                                                                                                                                                                                                                                                                                                                                                                                                                                                                                                                                                                                                                                                                                                                                                                                                                                                                                                                                                                                                                                                                                                                                                                                                                                                                                                                                                                                                                                                                                                                                 | 81       | 1062.526                                                                                                | YSEFLTR                          | 2                   | 2.1231   |         |        |          |        |       |   |    |          |               |   |        |   |    |          |               |   |        |   |    |          |                |   |        |   |    |          |               |   |        |   |    |          |                         |   |        |   |    |          |             |   |        |   |    |         |           |   |        |   |    |          |                |   |        |   |    |          |                         |   |        |    |    |          |                         |   |        |    |    |          |                                  |   |        |    |    |          |               |   |        |    |    |          |               |   |        |    |    |          |                              |   |  |
| 6                                                                                                                                                                                                                                                                                                                                                                                                                                                                                                                                                                                                                                                                                                                                                                                                                                                                                                                                                                                                                                                                                                                                                                                                                                                                                                                                                                                                                                                                                                                                                                                 | 18397286 | LHCB2.4 (Photosystem II light harvesting complex gene 2.3); chlorophyll binding [Arabidopsis thaliana]  |                                  | 2                   | 7%       |         |        |          |        |       |   |    |          |               |   |        |   |    |          |               |   |        |   |    |          |                |   |        |   |    |          |               |   |        |   |    |          |                         |   |        |   |    |          |             |   |        |   |    |         |           |   |        |   |    |          |                |   |        |   |    |          |                         |   |        |    |    |          |                         |   |        |    |    |          |                                  |   |        |    |    |          |               |   |        |    |    |          |               |   |        |    |    |          |                              |   |  |
|                                                                                                                                                                                                                                                                                                                                                                                                                                                                                                                                                                                                                                                                                                                                                                                                                                                                                                                                                                                                                                                                                                                                                                                                                                                                                                                                                                                                                                                                                                                                                                                   | 18397286 | CAB3 (CHLOROPHYLL A/B BINDING PROTEIN 3); chlorophyll binding [Arabidopsis thaliana]                    |                                  |                     | 7%       |         |        |          |        |       |   |    |          |               |   |        |   |    |          |               |   |        |   |    |          |                |   |        |   |    |          |               |   |        |   |    |          |                         |   |        |   |    |          |             |   |        |   |    |         |           |   |        |   |    |          |                |   |        |   |    |          |                         |   |        |    |    |          |                         |   |        |    |    |          |                                  |   |        |    |    |          |               |   |        |    |    |          |               |   |        |    |    |          |                              |   |  |
|                                                                                                                                                                                                                                                                                                                                                                                                                                                                                                                                                                                                                                                                                                                                                                                                                                                                                                                                                                                                                                                                                                                                                                                                                                                                                                                                                                                                                                                                                                                                                                                   | 16374    | chlorophyll a/b binding protein (LHCP AB 180) [Arabidopsis thaliana]                                    |                                  |                     | 8%       |         |        |          |        |       |   |    |          |               |   |        |   |    |          |               |   |        |   |    |          |                |   |        |   |    |          |               |   |        |   |    |          |                         |   |        |   |    |          |             |   |        |   |    |         |           |   |        |   |    |          |                |   |        |   |    |          |                         |   |        |    |    |          |                         |   |        |    |    |          |                                  |   |        |    |    |          |               |   |        |    |    |          |               |   |        |    |    |          |                              |   |  |
|                                                                                                                                                                                                                                                                                                                                                                                                                                                                                                                                                                                                                                                                                                                                                                                                                                                                                                                                                                                                                                                                                                                                                                                                                                                                                                                                                                                                                                                                                                                                                                                   | 15220615 | CAB1 (CHLOROPHYLL A/B BINDING PROTEIN 1); chlorophyll binding [Arabidopsis thaliana]                    |                                  |                     | 7%       |         |        |          |        |       |   |    |          |               |   |        |   |    |          |               |   |        |   |    |          |                |   |        |   |    |          |               |   |        |   |    |          |                         |   |        |   |    |          |             |   |        |   |    |         |           |   |        |   |    |          |                |   |        |   |    |          |                         |   |        |    |    |          |                         |   |        |    |    |          |                                  |   |        |    |    |          |               |   |        |    |    |          |               |   |        |    |    |          |                              |   |  |
|                                                                                                                                                                                                                                                                                                                                                                                                                                                                                                                                                                                                                                                                                                                                                                                                                                                                                                                                                                                                                                                                                                                                                                                                                                                                                                                                                                                                                                                                                                                                                                                   | 18403546 | LHB1B2 (Photosystem II light harvesting complex gene 1.5); chlorophyll binding [Arabidopsis thaliana]   |                                  |                     | 7%       |         |        |          |        |       |   |    |          |               |   |        |   |    |          |               |   |        |   |    |          |                |   |        |   |    |          |               |   |        |   |    |          |                         |   |        |   |    |          |             |   |        |   |    |         |           |   |        |   |    |          |                |   |        |   |    |          |                         |   |        |    |    |          |                         |   |        |    |    |          |                                  |   |        |    |    |          |               |   |        |    |    |          |               |   |        |    |    |          |                              |   |  |
|                                                                                                                                                                                                                                                                                                                                                                                                                                                                                                                                                                                                                                                                                                                                                                                                                                                                                                                                                                                                                                                                                                                                                                                                                                                                                                                                                                                                                                                                                                                                                                                   | 18403549 | LHB1B1 (Photosystem II light harvesting complex gene 1.4); chlorophyll binding [Arabidopsis thaliana]   |                                  |                     | 7%       |         |        |          |        |       |   |    |          |               |   |        |   |    |          |               |   |        |   |    |          |                |   |        |   |    |          |               |   |        |   |    |          |                         |   |        |   |    |          |             |   |        |   |    |         |           |   |        |   |    |          |                |   |        |   |    |          |                         |   |        |    |    |          |                         |   |        |    |    |          |                                  |   |        |    |    |          |               |   |        |    |    |          |               |   |        |    |    |          |                              |   |  |
|                                                                                                                                                                                                                                                                                                                                                                                                                                                                                                                                                                                                                                                                                                                                                                                                                                                                                                                                                                                                                                                                                                                                                                                                                                                                                                                                                                                                                                                                                                                                                                                   | 15224465 | LHCB2.2 (Photosystem II light harvesting complex gene 2.2); chlorophyll binding [Arabidopsis thaliana]  |                                  |                     | 7%       |         |        |          |        |       |   |    |          |               |   |        |   |    |          |               |   |        |   |    |          |                |   |        |   |    |          |               |   |        |   |    |          |                         |   |        |   |    |          |             |   |        |   |    |         |           |   |        |   |    |          |                |   |        |   |    |          |                         |   |        |    |    |          |                         |   |        |    |    |          |                                  |   |        |    |    |          |               |   |        |    |    |          |               |   |        |    |    |          |                              |   |  |
|                                                                                                                                                                                                                                                                                                                                                                                                                                                                                                                                                                                                                                                                                                                                                                                                                                                                                                                                                                                                                                                                                                                                                                                                                                                                                                                                                                                                                                                                                                                                                                                   | 15224471 | LHCB2.1 (Photosystem II light harvesting complex gene 2.1); chlorophyll binding [Arabidopsis thaliana]  |                                  |                     | 7%       |         |        |          |        |       |   |    |          |               |   |        |   |    |          |               |   |        |   |    |          |                |   |        |   |    |          |               |   |        |   |    |          |                         |   |        |   |    |          |             |   |        |   |    |         |           |   |        |   |    |          |                |   |        |   |    |          |                         |   |        |    |    |          |                         |   |        |    |    |          |                                  |   |        |    |    |          |               |   |        |    |    |          |               |   |        |    |    |          |                              |   |  |
|                                                                                                                                                                                                                                                                                                                                                                                                                                                                                                                                                                                                                                                                                                                                                                                                                                                                                                                                                                                                                                                                                                                                                                                                                                                                                                                                                                                                                                                                                                                                                                                   | 4741944  | Lhcb2 protein [Arabidopsis thaliana]                                                                    |                                  |                     | 7%       |         |        |          |        |       |   |    |          |               |   |        |   |    |          |               |   |        |   |    |          |                |   |        |   |    |          |               |   |        |   |    |          |                         |   |        |   |    |          |             |   |        |   |    |         |           |   |        |   |    |          |                |   |        |   |    |          |                         |   |        |    |    |          |                         |   |        |    |    |          |                                  |   |        |    |    |          |               |   |        |    |    |          |               |   |        |    |    |          |                              |   |  |
|                                                                                                                                                                                                                                                                                                                                                                                                                                                                                                                                                                                                                                                                                                                                                                                                                                                                                                                                                                                                                                                                                                                                                                                                                                                                                                                                                                                                                                                                                                                                                                                   | 12324161 | chlorophyll A-B-binding protein 2 precursor, 5_Quote_ partial; 1-750 [Arabidopsis thaliana]             |                                  |                     | 7%       |         |        |          |        |       |   |    |          |               |   |        |   |    |          |               |   |        |   |    |          |                |   |        |   |    |          |               |   |        |   |    |          |                         |   |        |   |    |          |             |   |        |   |    |         |           |   |        |   |    |          |                |   |        |   |    |          |                         |   |        |    |    |          |                         |   |        |    |    |          |                                  |   |        |    |    |          |               |   |        |    |    |          |               |   |        |    |    |          |                              |   |  |
|                                                                                                                                                                                                                                                                                                                                                                                                                                                                                                                                                                                                                                                                                                                                                                                                                                                                                                                                                                                                                                                                                                                                                                                                                                                                                                                                                                                                                                                                                                                                                                                   | 4741948  | Lhcb2 protein [Arabidopsis thaliana]                                                                    |                                  |                     | 7%       |         |        |          |        |       |   |    |          |               |   |        |   |    |          |               |   |        |   |    |          |                |   |        |   |    |          |               |   |        |   |    |          |                         |   |        |   |    |          |             |   |        |   |    |         |           |   |        |   |    |          |                |   |        |   |    |          |                         |   |        |    |    |          |                         |   |        |    |    |          |                                  |   |        |    |    |          |               |   |        |    |    |          |               |   |        |    |    |          |                              |   |  |
|                                                                                                                                                                                                                                                                                                                                                                                                                                                                                                                                                                                                                                                                                                                                                                                                                                                                                                                                                                                                                                                                                                                                                                                                                                                                                                                                                                                                                                                                                                                                                                                   | 17473828 | chlorophyll a/b-binding protein [Arabidopsis thaliana]                                                  |                                  |                     | 7%       |         |        |          |        |       |   |    |          |               |   |        |   |    |          |               |   |        |   |    |          |                |   |        |   |    |          |               |   |        |   |    |          |                         |   |        |   |    |          |             |   |        |   |    |         |           |   |        |   |    |          |                |   |        |   |    |          |                         |   |        |    |    |          |                         |   |        |    |    |          |                                  |   |        |    |    |          |               |   |        |    |    |          |               |   |        |    |    |          |                              |   |  |
| <table border="1"> <thead> <tr> <th>&gt; Score</th> <th>&gt; Mass</th> <th>Sequence</th> <th>Charge</th> <th>xCorr</th> </tr> </thead> <tbody> <tr><td>1</td><td>89</td><td>1252.676</td><td>NRELEVIHSR</td><td>3</td><td>3.7774</td></tr> <tr><td>2</td><td>76</td><td>963.4987</td><td>FGEAVWFK</td><td>2</td><td>2.9319</td></tr> </tbody> </table>                                                                                                                                                                                                                                                                                                                                                                                                                                                                                                                                                                                                                                                                                                                                                                                                                                                                                                                                                                                                                                                                                                                                                                                                                            |          |                                                                                                         |                                  |                     |          | > Score | > Mass | Sequence | Charge | xCorr | 1 | 89 | 1252.676 | NRELEVIHSR    | 3 | 3.7774 | 2 | 76 | 963.4987 | FGEAVWFK      | 2 | 2.9319 |   |    |          |                |   |        |   |    |          |               |   |        |   |    |          |                         |   |        |   |    |          |             |   |        |   |    |         |           |   |        |   |    |          |                |   |        |   |    |          |                         |   |        |    |    |          |                         |   |        |    |    |          |                                  |   |        |    |    |          |               |   |        |    |    |          |               |   |        |    |    |          |                              |   |  |
| > Score                                                                                                                                                                                                                                                                                                                                                                                                                                                                                                                                                                                                                                                                                                                                                                                                                                                                                                                                                                                                                                                                                                                                                                                                                                                                                                                                                                                                                                                                                                                                                                           | > Mass   | Sequence                                                                                                | Charge                           | xCorr               |          |         |        |          |        |       |   |    |          |               |   |        |   |    |          |               |   |        |   |    |          |                |   |        |   |    |          |               |   |        |   |    |          |                         |   |        |   |    |          |             |   |        |   |    |         |           |   |        |   |    |          |                |   |        |   |    |          |                         |   |        |    |    |          |                         |   |        |    |    |          |                                  |   |        |    |    |          |               |   |        |    |    |          |               |   |        |    |    |          |                              |   |  |
| 1                                                                                                                                                                                                                                                                                                                                                                                                                                                                                                                                                                                                                                                                                                                                                                                                                                                                                                                                                                                                                                                                                                                                                                                                                                                                                                                                                                                                                                                                                                                                                                                 | 89       | 1252.676                                                                                                | NRELEVIHSR                       | 3                   | 3.7774   |         |        |          |        |       |   |    |          |               |   |        |   |    |          |               |   |        |   |    |          |                |   |        |   |    |          |               |   |        |   |    |          |                         |   |        |   |    |          |             |   |        |   |    |         |           |   |        |   |    |          |                |   |        |   |    |          |                         |   |        |    |    |          |                         |   |        |    |    |          |                                  |   |        |    |    |          |               |   |        |    |    |          |               |   |        |    |    |          |                              |   |  |
| 2                                                                                                                                                                                                                                                                                                                                                                                                                                                                                                                                                                                                                                                                                                                                                                                                                                                                                                                                                                                                                                                                                                                                                                                                                                                                                                                                                                                                                                                                                                                                                                                 | 76       | 963.4987                                                                                                | FGEAVWFK                         | 2                   | 2.9319   |         |        |          |        |       |   |    |          |               |   |        |   |    |          |               |   |        |   |    |          |                |   |        |   |    |          |               |   |        |   |    |          |                         |   |        |   |    |          |             |   |        |   |    |         |           |   |        |   |    |          |                |   |        |   |    |          |                         |   |        |    |    |          |                         |   |        |    |    |          |                                  |   |        |    |    |          |               |   |        |    |    |          |               |   |        |    |    |          |                              |   |  |
| 7                                                                                                                                                                                                                                                                                                                                                                                                                                                                                                                                                                                                                                                                                                                                                                                                                                                                                                                                                                                                                                                                                                                                                                                                                                                                                                                                                                                                                                                                                                                                                                                 | 7529041  | ribulose-1,5-bisphosphate carboxylase/oxygenase large subunit [Arabidopsis thaliana]                    |                                  | 2                   | 4%       |         |        |          |        |       |   |    |          |               |   |        |   |    |          |               |   |        |   |    |          |                |   |        |   |    |          |               |   |        |   |    |          |                         |   |        |   |    |          |             |   |        |   |    |         |           |   |        |   |    |          |                |   |        |   |    |          |                         |   |        |    |    |          |                         |   |        |    |    |          |                                  |   |        |    |    |          |               |   |        |    |    |          |               |   |        |    |    |          |                              |   |  |
|                                                                                                                                                                                                                                                                                                                                                                                                                                                                                                                                                                                                                                                                                                                                                                                                                                                                                                                                                                                                                                                                                                                                                                                                                                                                                                                                                                                                                                                                                                                                                                                   | 1944432  | ribulosebisphosphate carboxylase [Arabidopsis thaliana]                                                 |                                  |                     | 5%       |         |        |          |        |       |   |    |          |               |   |        |   |    |          |               |   |        |   |    |          |                |   |        |   |    |          |               |   |        |   |    |          |                         |   |        |   |    |          |             |   |        |   |    |         |           |   |        |   |    |          |                |   |        |   |    |          |                         |   |        |    |    |          |                         |   |        |    |    |          |                                  |   |        |    |    |          |               |   |        |    |    |          |               |   |        |    |    |          |                              |   |  |
|                                                                                                                                                                                                                                                                                                                                                                                                                                                                                                                                                                                                                                                                                                                                                                                                                                                                                                                                                                                                                                                                                                                                                                                                                                                                                                                                                                                                                                                                                                                                                                                   | 27752799 | ribulose 1,5-bisphosphate carboxylase/oxygenase large chain [Arabidopsis thaliana]                      |                                  |                     | 5%       |         |        |          |        |       |   |    |          |               |   |        |   |    |          |               |   |        |   |    |          |                |   |        |   |    |          |               |   |        |   |    |          |                         |   |        |   |    |          |             |   |        |   |    |         |           |   |        |   |    |          |                |   |        |   |    |          |                         |   |        |    |    |          |                         |   |        |    |    |          |                                  |   |        |    |    |          |               |   |        |    |    |          |               |   |        |    |    |          |                              |   |  |

| Serial#               | Gi        | Protein Name                                                                                             | Comment | Identified peptides            | Coverage     |
|-----------------------|-----------|----------------------------------------------------------------------------------------------------------|---------|--------------------------------|--------------|
|                       | 27752813  | ribulose 1,5-bisphosphate carboxylase/oxygenase large chain [Arabidopsis lyrata subsp. lyrata]           |         |                                |              |
|                       |           |                                                                                                          |         | > Score > Mass Sequence        | Charge xCorr |
|                       |           |                                                                                                          |         | 1 83 1021.531 DTDILAAFR        | 2 2.7963     |
|                       |           |                                                                                                          |         | 2 93 1228.653 DLAVEGNEIIR      | 2 3.0323     |
| 8                     | 7523929   | photosystem II 44 kDa protein [Arabidopsis thaliana]                                                     |         | 1                              | 3%           |
|                       | 27435858  | photosystem II CP43 protein [Arabidopsis thaliana]                                                       |         |                                | 4%           |
|                       | 172045852 | RecName: Full=Photosystem II 44 kDa reaction center protein; AltName: Full=P6 protein; AltName: Full ... |         |                                | 3%           |
|                       |           |                                                                                                          |         | > Score > Mass Sequence        | Charge xCorr |
|                       |           |                                                                                                          |         | 1 94 1426.765 LGANVGSAQGPTGLGK | 2 3.3656     |
| <b>Seq 20189 - #3</b> |           |                                                                                                          |         |                                |              |
| 1                     | 7523018   | ATP synthase CF1 alpha subunit [Arabidopsis thaliana]                                                    |         | 5                              | 11%          |
|                       |           |                                                                                                          |         | > Score > Mass Sequence        | Charge xCorr |
|                       |           |                                                                                                          |         | 1 82 876.5191 FLLQEKV          | 2 1.6795     |
|                       |           |                                                                                                          |         | 2 80 1604.865 TNKPQFQEIISTK    | 3 3.1529     |
|                       |           |                                                                                                          |         | 3 90 1252.701 VINALANPIDGR     | 2 3.5935     |
|                       |           |                                                                                                          |         | 4 85 1252.726 LIESPAPGIISR     | 2 2.849      |
|                       |           |                                                                                                          |         | 5 89 1416.785 IAQIPVSEAYLGR    | 2 2.6379     |
| 2                     | 7523033   | photosystem I P700 chlorophyll a apoprotein A1 [Arabidopsis thaliana]                                    |         | 2                              | 2%           |
|                       |           |                                                                                                          |         | > Score > Mass Sequence        | Charge xCorr |
|                       |           |                                                                                                          |         | 1 76 76 880.3796 DYDPTNR       | 2 1.1627     |
|                       |           |                                                                                                          |         | 2 81 1062.526 YSEFLTR          | 2 2.1231     |
| 3                     | 15222449  | LHCB2.4 (Photosystem II light harvesting complex gene 2.3); chlorophyll binding [Arabidopsis thaliana]   |         | 2                              | 7%           |
|                       | 18397286  | CAB3 (CHLOROPHYLL A/B BINDING PROTEIN 3); chlorophyll binding [Arabidopsis thaliana]                     |         |                                | 7%           |
|                       | 16374     | chlorophyll a/b binding protein (LHCP AB 180) [Arabidopsis thaliana]                                     |         |                                | 8%           |
|                       | 15220615  | CAB1 (CHLOROPHYLL A/B BINDING PROTEIN 1); chlorophyll binding [Arabidopsis thaliana]                     |         |                                | 7%           |
|                       | 18403546  | LHB1B2 (Photosystem II light harvesting complex gene 1.5); chlorophyll binding [Arabidopsis thaliana]    |         |                                | 7%           |
|                       | 18403549  | LHB1B1 (Photosystem II light harvesting complex gene 1.4); chlorophyll binding [Arabidopsis thaliana]    |         |                                | 7%           |
|                       | 15224465  | LHCB2.2 (Photosystem II light harvesting complex gene 2.2); chlorophyll binding [Arabidopsis thaliana]   |         |                                | 7%           |
|                       | 15224471  | LHCB2.1 (Photosystem II light harvesting complex gene 2.1); chlorophyll binding [Arabidopsis thaliana]   |         |                                | 7%           |
|                       | 4741944   | Lhcb2 protein [Arabidopsis thaliana]                                                                     |         |                                | 7%           |
|                       | 12324161  | chlorophyll A-B-binding protein 2 precursor, 5_'quote_' partial; 1-750 [Arabidopsis thaliana]            |         |                                | 7%           |
|                       | 4741948   | Lhcb2 protein [Arabidopsis thaliana]                                                                     |         |                                | 7%           |
|                       | 17473828  | chlorophyll a/b-binding protein [Arabidopsis thaliana]                                                   |         |                                | 7%           |
|                       |           |                                                                                                          |         | > Score > Mass Sequence        | Charge xCorr |
|                       |           |                                                                                                          |         | 1 89 1252.676 NRELEVIHSR       | 3 3.7774     |
|                       |           |                                                                                                          |         | 2 76 983.4987 FGEAVWFK         | 2 2.9319     |
| 4                     | 7523041   | ribulose-1,5-bisphosphate carboxylase/oxygenase large subunit [Arabidopsis thaliana]                     |         | 1                              | 2%           |
|                       | 1944432   | ribulosebisphosphate carboxylase [Arabidopsis thaliana]                                                  |         |                                | 2%           |
|                       | 27752799  | ribulose 1,5-bisphosphate carboxylase/oxygenase large chain [Arabidopsis thaliana]                       |         |                                | 2%           |
|                       | 27752813  | ribulose 1,5-bisphosphate carboxylase/oxygenase large chain [Arabidopsis lyrata subsp. lyrata]           |         |                                | 2%           |
|                       |           |                                                                                                          |         | > Score > Mass Sequence        | Charge xCorr |
|                       |           |                                                                                                          |         | 1 83 1021.531 DTDILAAFR        | 2 2.7963     |

Seq 20190 - #4 - No Identification

Seq 20191 - #5 - No Identification
